# Supplementary material
Source: Elsevier journal article supplement (https://www.sciencedirect.com/science/article/pii/S1130862117301456)
Supplement: mmc1 [file S1130862117301456:mmc1.pdf]

Cuadro 1: Contenido de las sesiones incluidas en la intervención.

| SESIÓN                 | DESCRIPCIÓN                                                                                                                                                                                                                                                                                                                                                                                                                                                                                                                                                                                                                                                                                                                                                                                                                                  | TAREAS PARA REALIZAR EN CASA                                                                                                                                                                                                                                                                                                                                                                                |
|------------------------|----------------------------------------------------------------------------------------------------------------------------------------------------------------------------------------------------------------------------------------------------------------------------------------------------------------------------------------------------------------------------------------------------------------------------------------------------------------------------------------------------------------------------------------------------------------------------------------------------------------------------------------------------------------------------------------------------------------------------------------------------------------------------------------------------------------------------------------------|-------------------------------------------------------------------------------------------------------------------------------------------------------------------------------------------------------------------------------------------------------------------------------------------------------------------------------------------------------------------------------------------------------------|
| Actividades generales: | Sesión 1: Presentación de la intervención y de las participantes a través de dinámicas de grupo para facilitar el conocimiento y la interrelación de los miembros del grupo.                                                                                                                                                                                                                                                                                                                                                                                                                                                                                                                                                                                                                                                                 | Sesiones 2 a 5: Acogida de los participantes mediante técnicas de dinamización grupal y Seguimiento de las tareas a realizar en el domicilio durante la semana.                                                                                                                                                                                                                                             |
| Sesión 1<br>(visita 1) | <ul style="list-style-type: none"> <li>- Educación sanitaria sobre la fibromialgia.</li> <li>- Información sobre asociaciones de afectados.</li> <li>- Terapia cognitiva conductual para motivar al cambio y practicar las técnicas de relajación y medidas físico-rehabilitadoras para el tratamiento del dolor (ejercicios físicos).</li> <li>- Relajación sofrológica de base.</li> <li>- Consejos para facilitar la práctica de las técnicas de relajación (respiración abdominal, concentración).</li> <li>- Tabla de ejercicios 1 para practicar en casa.</li> </ul>                                                                                                                                                                                                                                                                   | <p>Cada día: respiración abdominal</p> <p>2-3 días a la semana: relajación sofrológica de base y tabla de ejercicios 1</p>                                                                                                                                                                                                                                                                                  |
| Sesión 2<br>(visita 2) | <ul style="list-style-type: none"> <li>- Terapia cognitiva conductual. Reeducción de hábitos saludables: registro de los hábitos, hábitos que se desean modificar y por qué, potencialidades y aliados para modificar hábitos, dificultades y miedos para modificar hábitos, hábitos que se desean modificar pero se aplazan (motivos), hábitos que molestan pero no se modificaran, programación de los días según hábitos (potencialidades vs dificultades).</li> <li>- Terapia cognitiva conductual: introducción al pensamiento positivo, zona de confort, zona de pánico y zona mágica (resistencias al cambio, motivación, miedos, tensión emocional y tensión creativa).</li> <li>- Puntos de digito-puntura para la relajación.</li> <li>- Pirámide del ejercicio</li> <li>- Tabla de ejercicios 2 para practicar en casa</li> </ul> | <ul style="list-style-type: none"> <li>- Realizar horario con hábitos y actividades.</li> <li>- Ejercicios para evitar las pequeñas molestias.</li> <li>- Cada día: pensar 3 cosas positivas que han sucedido a lo largo del día y ejercitar la respiración abdominal.</li> <li>- 2-3 días a la semana: relajación sofrológica de base; relajación del día siguiente; tabla de ejercicios 1 y 2.</li> </ul> |

|                                      |                                                                                                                                                                                                                                                                                                                                                                                                                                                                                                                                                                                                                      |                                                                                                                                                                                                                                                                                                                                                                                                                                                                            |
|--------------------------------------|----------------------------------------------------------------------------------------------------------------------------------------------------------------------------------------------------------------------------------------------------------------------------------------------------------------------------------------------------------------------------------------------------------------------------------------------------------------------------------------------------------------------------------------------------------------------------------------------------------------------|----------------------------------------------------------------------------------------------------------------------------------------------------------------------------------------------------------------------------------------------------------------------------------------------------------------------------------------------------------------------------------------------------------------------------------------------------------------------------|
|                                      | <ul style="list-style-type: none"> <li>- Relajación del día siguiente (auto-programación mental del día siguiente tal y como se desea).</li> </ul>                                                                                                                                                                                                                                                                                                                                                                                                                                                                   |                                                                                                                                                                                                                                                                                                                                                                                                                                                                            |
| <b>Sesión 3</b><br><b>(visita 3)</b> | <ul style="list-style-type: none"> <li>- Terapia cognitiva conductual: modificación del pensamiento, romper con los pensamientos negativos, el pensamiento reptiliano, pensamiento positivo. Introducción al autoconocimiento y la autoestima. Establecimiento y consecución de objetivos (sueños, miedos, toma de decisiones y autogobierno de la vida propia, técnicas de empowerment).</li> <li>- Técnicas de visualizaciones.</li> <li>- Tabla de ejercicios 3</li> <li>- Relajación del objeto neutro (visualización de un objeto o lugar que ayude al participante a relajar el cuerpo y la mente).</li> </ul> | <ul style="list-style-type: none"> <li>- Escribir 5 cualidades positivas que se tengan.</li> <li>Cada día: pensar 3 cosas positivas que han sucedido a lo largo del día y respiración abdominal.</li> <li>- 1 día en la semana: relajación del día siguiente.</li> <li>- 2-3 días a la semana: relajación sofrológica de base; relajación del objeto neutro; tabla de ejercicios 1, 2 y 3</li> </ul>                                                                       |
| <b>Sesión 4</b><br><b>(visita 4)</b> | <ul style="list-style-type: none"> <li>- Educación sanitaria: recomendaciones sobre la dieta adaptada a la patología.</li> <li>- Terapia cognitiva conductual: autoconocimiento (valores y creencias), ejercicio para conocer los propios valores.</li> <li>- Autoconocimiento del dolor: medir el dolor, control del dolor a través de la relajación de externalización del dolor</li> </ul>                                                                                                                                                                                                                        | <ul style="list-style-type: none"> <li>- Ampliar a 20 las cualidades positivas que se tengan (pueden pedir ayuda).</li> <li>- Cada día: pensar 3 cosas positivas que han sucedido a lo largo del día y respiración abdominal.</li> <li>- 2-3 días a la semana: relajación sofrológica de base, tabla de ejercicios 1, 2 y 3.</li> <li>- 1 día en la semana: relajación del día siguiente; relajación del objeto neutro; relajación de externalización del dolor</li> </ul> |
| <b>Sesión 5</b><br><b>(visita 5)</b> | <ul style="list-style-type: none"> <li>- Educación sanitaria: higiene del sueño.</li> <li>- Terapia cognitiva conductual: la capacidad de ilusionarse, la felicidad, glándula del timo.</li> <li>- Técnica de relajación dinámica (relajación del negativo): relajación mental y física; tensión-distensión muscular.</li> <li>-Evaluación del programa.</li> </ul>                                                                                                                                                                                                                                                  | <ul style="list-style-type: none"> <li>- Practicar en casa entre 3 y 5 veces por semana los ejercicios aprendidos durante la intervención</li> </ul>                                                                                                                                                                                                                                                                                                                       |

Fuente: elaboración de los autores.
